# Supplementary material
Source: PubMed Central journal article supplement (PMC2663764)
Supplement: pp.108.131490_1.pdf [file pp.108.131490_1.pdf]

## Supplemental Data #1

Autophagy Movies: Monitoring autophagy in *Saccharomyces cerevisiae* with the laser scanning confocal microscopy is available at <http://biology4.wustl.edu/autophagy>

A full length *GFP* cDNA fragment was inserted into the yeast expression vector pYPR3831 between the *GALI* promoter and the glyceraldehydes 3-phosphate dehydrogenase terminator (Imai et al., 1996). Wild-type yeast cells (strain w303) and the *yop1* deletion mutant (Brands and Ho, 2002) were transformed with this pYPR3831-*GFP*. Transformed yeast cells were grown in a synthetic drop-out medium (-Trp) containing 2% galactose for 44 hrs at 30 °C. These cells were harvested using centrifugation at 3750 *g* for two min, and resuspended to rinse with a synthetic drop-out medium (-Trp) containing 2% galactose and 1 mM PMSF but without nitrogen base and amino acids. These cells were spun down again, resuspended in the rinse medium and incubated in the same growth conditions for the time indicated in the Results. Cells were imaged by a Leica laser scanning confocal microscope. The images deposited in the supplemental database were taken every six seconds serially using time scan at 488 nm excitation wavelength.
