# Supplementary material
Source: PubMed Central journal article supplement (PMC2663764)
Supplement: pp.108.131490_2.pdf [file pp.108.131490_2.pdf]

## Supplemental Data #2

Confirmed Arabidopsis AtHVA22 T-DNA insertion mutants showing occasional and variable morphological phenotypes

| Gene            | Mutant            | Confirmed insertion site (relative to start codon) |
|-----------------|-------------------|----------------------------------------------------|
| <i>AtHVA22a</i> | <i>athva22a-1</i> | -110                                               |
| <i>AtHVA22b</i> | Non-existing      |                                                    |
| <i>AtHVA22c</i> | <i>athva22c-2</i> | +609                                               |
| <i>AtHVA22d</i> | <i>athva22d-1</i> | -99                                                |
| <i>AtHVA22d</i> | <i>athva22d-2</i> | +746                                               |
| <i>AtHVA22d</i> | <i>athva22d-4</i> | +743                                               |
| <i>AtHVA22e</i> | <i>athva22e-1</i> | +726                                               |
| <i>AtHVA22e</i> | <i>athva22e-2</i> | +700                                               |
